1  
2  
3  
4  
5  
6  
7  
8  
9  
10  
11  
12  
13  
14  
15  
16  
17  
18  
19  
20  
21  
22  
23  
24  
25  
26  
27  
28  
29  
30  
31  
32  
33  
34  
35  
36  
37  
38  
39  
40  
41  
42

## **Whole-brain MEG decoding of symbolic and non-symbolic number stimuli reveals primarily format-dependent representations**

Bankson, Brett B.<sup>1,2\*</sup>, Janini, Daniel<sup>1,3\*</sup>, & Baker, Chris I.<sup>1</sup>

<sup>1</sup>Section on Learning and Plasticity, Laboratory of Brain and Cognition, National Institute of Mental Health, National Institutes of Health, Bethesda, MD 20892, USA.

<sup>2</sup>Department of Psychology, University of Pittsburgh, 210 South Bouquet St, Pittsburgh, PA 15260, USA.

<sup>3</sup>Department of Psychology, Harvard University, William James Hall, 33 Kirkland St, Cambridge, MA 02138, USA.

\* equal contribution

Correspondence should be addressed to:

Brett B. Bankson  
Laboratory of Cognitive Neurodynamics  
UPMC Presbyterian  
Suite B-400  
200 Lothrop Street  
Pittsburgh, PA 15213  
bbb17@pitt.edu

Conflict of Interest: The authors declare no competing financial interests.

Acknowledgments: This work was supported by the Intramural Research Program of the National Institute of Mental Health (ZIA-MH-002909) – National Institute of Mental Health Clinical Study Protocol 93-M-0170, NCT00001360.

## 43 **Abstract**

44

45 The human brain can rapidly form representations of numerical magnitude, whether presented  
46 with symbolic stimuli like digits and words or non-symbolic stimuli like dot displays. Little is  
47 known about the relative time course of these symbolic and non-symbolic number  
48 representations. We investigated the emergence of number representations for three stimulus  
49 formats - digits, words, and dot arrays - by applying multivariate pattern analysis to MEG  
50 recordings from 22 participants. We first conducted within-format classification to identify the  
51 time course by which individual numbers can be decoded from the MEG signal. Peak  
52 classification accuracy for individual numbers in all three formats occurred around 110 ms after  
53 stimulus onset. Next, we used between-format classification to determine the time course of  
54 shared number representations between stimulus formats. Classification accuracy between  
55 formats was much weaker than within format classification, but it was also significant at early  
56 time points, around 100 ms for both digit / dot and digit / word comparisons. We then used  
57 representational similarity analysis to determine if we could explain variance in the MEG  
58 representational geometry using two models: a GIST feature model capturing low-level visual  
59 properties and an approximate number model capturing the numerical magnitude of the  
60 stimuli. Model RSA results differed between stimulus formats: while the GIST model explained  
61 unique variance from 100-300 ms for all number formats, the performance of the approximate  
62 number model differed between formats. Together, these results are consistent with the view  
63 that distinct, format-specific number representations, more so than a single “abstract” number  
64 representation, form the basis of numerical comparison.

65

66

## 67 **Introduction**

68

69 The human brain can support a multitude of different representations for number. These  
70 representations enable both the estimation of the number of objects in our environment and  
71 formal mathematics over number symbols like digits. When the brain receives sensory input  
72 from a set of objects, it represents their numerosity through an approximate number system  
73 (ANS) (Feigenson et al., 2004). This representational system is shared among many animals  
74 including prelinguistic human infants (Xu and Spelke, 2000), monkeys (Cantlon and Brannon,  
75 2006), crows (Ditz and Nieder, 2015), and fish (Agrillo et al., 2012, Piffer et al., 2013). In  
76 addition to this phylogenetically ancient system of representation, modern literate humans also  
77 represent number through written symbols of digits and number words. The extent to which  
78 these symbolic and nonsymbolic number representations rely on shared neural substrates has  
79 been queried for decades. These efforts have primarily focused on whether the same brain  
80 areas implement symbolic and nonsymbolic number representations, while fewer studies have  
81 compared the time course of symbolic and nonsymbolic number representations. In order to  
82 address the ways in which symbolic and nonsymbolic number representations rely on shared  
83 versus distinct neural resources, we must address both when and where these representations  
84 are implemented. In the current study, we coupled magnetoencephalography (MEG) with

85 multivariate decoding and representational similarity analysis (RSA) to elucidate the temporal  
86 dynamics of number processing across distinct representational formats.

87 Extensive neuroscientific evidence supports the view that approximate number  
88 representations are implemented by neural populations within parietal and frontal cortex. A  
89 key hallmark of the ANS is its relationship to Weber's law such that the discriminability of two  
90 sets of objects depends on their ratio rather than their respective absolute values (Feigenson et  
91 al, 2004). Neuroscientific work in both non-human primates and humans has revealed  
92 analogous neural tuning for number in lateral prefrontal cortex and intraparietal sulcus (Piazza  
93 et al., 2004, Bulthé et al., 2014, Nieder, 2016), supporting the view that these regions form the  
94 basis of the ANS.

95 In order for visual symbols like digits and number words to activate numerical  
96 representations, they must first be categorized. This process is putatively achieved by the  
97 reading circuits of the ventral visual pathway (Dehaene, 2009), culminating in the formation of  
98 a number form or word form representation tolerant to low-level changes in the font, size, and  
99 position of the visual symbol. Within this system, there is ongoing debate surrounding the  
100 extent to which the formation of number and word forms depends on shared or distinct neural  
101 regions within the ventral visual stream (Yeo et al., 2017). After a visual number symbol is  
102 categorized, representations of its meaning can be activated. A central question in the study of  
103 numerical cognition is what these symbolic number representations entail. One possibility is  
104 that number symbols activate the same representations as nonsymbolic dot displays, more  
105 specifically the ANS. An alternative possibility is that number symbols primarily gain numerical  
106 content by activating representations distinct from the ANS, perhaps concepts involved in  
107 abstract logic and language rather than concepts that ground out in visual perception.

108 Although it is unclear how these symbolic and nonsymbolic number representations are  
109 implemented neurally, behavioral experiments indicate that nonsymbolic and symbolic number  
110 are partially represented through shared resources. For instance, participant reaction times  
111 when comparing the magnitudes of two digits are a function of numerical distance between the  
112 digits, suggesting the use of an analog scale similar to the ANS (Moyer and Landauer, 1967;  
113 Dehaene et al., 1990). There has been extensive debate about whether number symbols  
114 activate neural populations in parietal cortex that represent "abstract" number, meaning  
115 number representations elicited by symbolic and non-symbolic number stimuli across sensory  
116 modalities (Kadosh and Walsh, 2009). Lussier and Cantlon (2017) recorded fMRI activity as  
117 participants compared the magnitudes of numbers and found that the level of activity in the  
118 intraparietal sulcus is modulated by numerical ratio for both symbolic and nonsymbolic number  
119 stimuli. Moreover, it has been reported that intraparietal sulcus adapts to repeated  
120 presentations of the same magnitude for both digits and dot displays, and that recovery from  
121 this adaptation can occur across these stimulus formats (Piazza et al., 2007). In contrast,  
122 multivoxel pattern analyses suggest that symbolic and nonsymbolic number representations  
123 are implemented by different patterns of activation within intraparietal sulcus (Bulthé et al.,  
124 2014; Bulthé et al., 2015). Thus, while behavior indicates a link between nonsymbolic and  
125 symbolic number representations, it is less clear how this link is instantiated by the brain  
126 despite the large number of studies investigating the spatial localization of number  
127 representations.

128 While most prior work has focused on the spatial localization of number representation,  
129 there is a relative lack of understanding of the time course of these representations. Recently,  
130 Teichmann et al. (2018) used MEG and multivariate pattern analyses to study how neural  
131 representations of symbolic number (digits and dice) emerge over time. Their findings  
132 suggested that format-specific representations of symbolic number emerge within 150 ms of  
133 stimulus presentation, and more tentatively that shared representations between the two  
134 symbolic formats emerged later around 400 ms after stimulus presentation. Here, we build  
135 upon these findings by investigating the time course of both symbolic and nonsymbolic number  
136 representations rather than just symbolic number representations. Using MEG, we measured  
137 the neural response to visual number stimuli (values 6-13) in the following formats: 1) digits, 2)  
138 number words, 3) and dot displays. We used a decoding approach to determine how quickly  
139 the brain forms representations of individual numbers within each of these formats. Next, we  
140 determined whether we could find evidence of shared number representations by conducting  
141 cross-decoding across formats. Finally, we used RSA to determine when models of low-level  
142 visual shape and number magnitude predicted the neural responses in the brain. By  
143 emphasizing the temporal dynamics of visual number processing, we offer new means of  
144 comparing the neural substrates that underlie symbolic and non-symbolic processing.

145

146

## 147 **Methods**

148

### 149 *Participants*

150 22 healthy participants (17 female, age range 20-44) with normal or corrected-to-normal vision  
151 participated in the current study. All participants gave written informed consent before  
152 participation as a part of the study protocol 93-M-0170, NCT00001360. This study was  
153 conducted according to the Declaration of Helsinki and was approved by the Institutional  
154 Review Board of the National Institutes of Health.

155

### 156 *Stimuli*

157 We created three sets of number stimuli that ranged from 4-18 in magnitude (Figure 1). One set  
158 contained numbers represented as digits, a second set contained numbers represented as  
159 words, and third set contained numbers represented as dot arrays. These three sets allowed us  
160 to examine visual processing of symbolic (digits, words) and non-symbolic (dots) number  
161 formats. All three stimulus sets were presented in white, subtending a maximum of 6° x 6° of  
162 visual angle and centered on a black background (participant viewing distance: 70 cm). To  
163 maximize within-format variability in visual features, 32 unique exemplars were generated for  
164 each magnitude in the digit and word stimulus sets. 26 of these exemplars were formed from  
165 different fonts, and the other 6 exemplars were formed using hand-written scripts from 3  
166 individuals who were not involved with the study. A similar procedure was used for the dot  
167 array stimuli, whereby 32 unique exemplars for each number were generated with a script by  
168 Gebuis and Reynvoet (2011).

169

## a. Example stimuli

|     |       |       |      |     |        |        |          |
|-----|-------|-------|------|-----|--------|--------|----------|
| 6   | 7     | 8     | 9    | 10  | 11     | 12     | 13       |
| SIX | SEVEN | EIGHT | NINE | TEN | ELEVEN | TWELVE | thirteen |
|     |       |       |      |     |        |        |          |

## b. Example trials

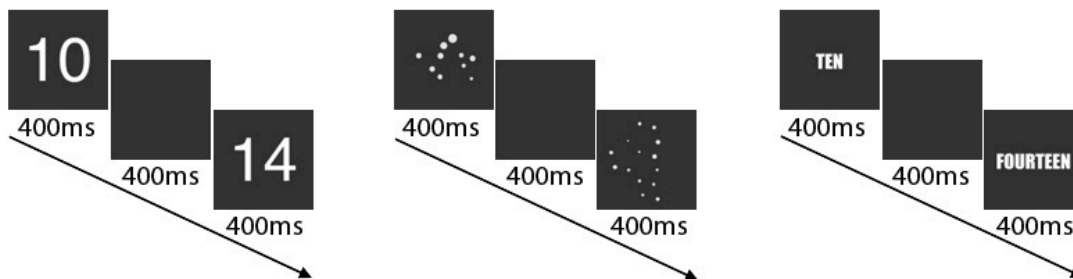

170 **Figure 1.** Example stimuli and trial progression. **a.** 32 different stimuli were generated for each number in each  
171 format. Here we show one example for each number in each format. **b.** Stimuli were presented on a black  
172 background for 400ms, followed by a blank black screen for 400ms, and then followed by the second stimulus for  
173 400ms. Upon presentation of the second stimulus, participants judged whether the second stimulus was larger or  
174 smaller than the first stimulus and responded via button press. The first stimulus was always a number from 6-13.

175

### 176 *Procedure*

177 For the MEG recordings, participants entered an electromagnetically shielded MEG chamber  
178 where they were seated upright within the dewar. Stimuli were presented with the  
179 Psychophysics Toolbox (Brainard, 1997) in MATLAB (version 2016a, Mathworks, Natick, MA).  
180 Visual presentation was controlled by a Panasonic PT-D3500U DLP projector with an ET-DLE400  
181 lens, located outside the chamber and projected through a series of mirrors onto a back-  
182 projection screen in front of the seated participant.

183

### 184 *Task*

185 Participants completed a magnitude comparison task during MEG recording. While fixating,  
186 participants were presented with a number for 400 ms, followed by a delay period with blank  
187 screen of 400 ms, a second number for 400 ms, followed by an inter-trial interval of  $1800 \pm 100$   
188 ms that consisted of a blank screen and fixation cross. Participants responded after the  
189 presentation of the second number with a button press to indicate whether the second number  
190 was larger or smaller than the first number. The first number was always between 6 and 13,  
191 and the second number was always 20% or 40% smaller or larger than the magnitude of the

192 first number, rounding to the nearest whole number. Because discriminability of number  
193 magnitudes is a function of the number pair ratio, we controlled for task difficulty by  
194 maintaining a set ratio between number pairs in this task.

195 One complication with number comparison over dot displays is that many visual cues  
196 also tend to increase along with numerosity. The script used to generate our dot-stimuli  
197 (Gebuis and Reynvoet, 2011) accounted for this potential confound by minimizing the extent to  
198 which the visual cues of area extended, density, surface area, item size, and circumference  
199 predict numerical distance between pairs of numbers. Thus, participants had to encode the  
200 actual numerosity of the dot display stimuli in order to complete the task rather than simply  
201 attending to one of these other visual cues.

202 Participants completed 12 experimental runs that were divided into 4 blocks of 3 runs  
203 each, with self-paced breaks between each block. Each run contained 128 trials with a fixed  
204 number stimulus format, i.e. only digits, or words, or dot arrays. Within each format,  
205 participants were presented with each number 6-13 a total of 64 times. Each run lasted 384  
206 seconds, resulting in a total experimental time of 76 minutes.

207

### 208 *MEG acquisition and preprocessing*

209 MEG data were recorded continuously with a 275-channel CTF whole-head MEG system at a  
210 sampling rate of 1200 Hz (MEG International Services, Ltd., Coquitlam, BC, Canada). All analyses  
211 were conducted in MATLAB (version 2017a, The Mathworks, Natick, MA). Preprocessing steps  
212 used Brainstorm 3.4 (version 02/2016, Tadel et al., 2011) and custom-written code similar to  
213 recently published MEG decoding work (Bankson et al., 2018). Recordings were obtained from  
214 272 channels (dead channels: MLF25, MRF43, MRO13), consisting of radial first-order  
215 gradiometer channels with synthetic third-gradient balancing to remove background noise  
216 online. Participants' head position was localized at the beginning of the experiment and after  
217 each experimental block, using fiducial coil readings at the nasion, left and right preauricular  
218 points. We recorded this head position information to provide feedback about the quality of  
219 head placement in the dewar. Data were bandpass filtered between 0.1 and 300 Hz, and  
220 bandstop filtered at 60 Hz and harmonics. Data were segmented into single trial bins consisting  
221 of 100 ms pre-stimulus baseline activity for normalization purposes and 900 ms activity after  
222 the first number presentation of each trial.

223 To increase SNR and decrease computational load, we employed three additional pre-  
224 processing steps (outlined in Bankson et al, 2018): PCA dimensionality reduction, temporal  
225 smoothing on PCA components, and data downsampling. Principal components analysis (PCA)  
226 was run to reduce the number of channels into the set of most descriptive components. All  
227 data for an MEG channel across trials were concatenated for PCA, and the components  
228 explaining the least variance were removed to speed-up further processing, with a maximum  
229 removal of 30% of the components (i.e. 80 components) or 1 % of the variance, whichever was  
230 reached first (Hebart et al., 2018). For all participants, the smallest 80 components explained  
231 less than 1% of the variance, so the data for all further analyses contained 192 components.  
232 Data across all time points were normalized according to the baseline period of -100 to 0 ms  
233 relative to stimulus presentation. To do so, the mean and standard deviation of the baseline  
234 period for each component were computed, and the mean was subtracted from the data  
235 before dividing by the standard deviation. We then used a Gaussian kernel of  $\pm 15$  ms half



236 duration at half maximum (HDHM) to temporally smooth the remaining components, and  
237 downsampled the components to 120 Hz (121 samples / trial).

238

### 239 *Multivariate decoding and cross-classification*

240 We first used time-resolved multivariate classification of MEG data within each participant to  
241 examine the representational dynamics of symbolic and non-symbolic number stimuli. To  
242 determine the extent to which distributed neural representations for different numbers are  
243 discriminable from one another over time, we used a linear support vector machine  
244 implemented with LIBSVM in MATLAB (SVM; Chang & Lin, 2011). Analyses are based on general  
245 guidelines for multivariate MEG analysis (Grootswagers et al., 2017). Functions from The  
246 Decoding Toolbox (Hebart et al., 2015) and custom written code were used for subsequent  
247 analyses, which were applied to all participants.

248 Because our stimuli comprised both symbolic (digits and words) and non-symbolic (dots)  
249 number stimuli, we focused our analyses on identifying the emergence of discriminable  
250 representations of individual numbers both within and across stimulus formats. Below, we  
251 outline analyses for within-format pairwise classification and between-format pairwise cross-  
252 classification. This set of analyses allowed us to investigate the possibility of format-specific and  
253 format-independent representations of number.

254

### 255 *Within-format SVM classification*

256 The following within-format classification steps were conducted independently for each  
257 stimulus format of digit, word, and dot array trials. For each format, we created supertrials in  
258 training and test sets by averaging 4 trials of the same number drawn randomly without  
259 replacement (Isik et al., 2013). At every downsampled time point, preprocessed MEG data for  
260 each supertrial were arranged as a  $P$  dimensional vector (equal to the number of components  
261 from PCA preprocessing). This yielded  $K$  pattern vectors for each time point and number. For  
262 each pair of numbers at every time point, we used leave-one-out classification by training a  
263 classifier on  $K-1$  pattern vectors and testing on the pair of left-out pattern vectors.

264 The random generation of supertrials and subsequent classification procedure of  
265 assigning training and testing sets was repeated 100 times for each pair of numerosities at each  
266 time point. The resulting decoding accuracies were averaged across the 100 iterations and  
267 yielded an  $8 \times 8$  matrix at every time point, with the rows and columns indexed according to  
268 numbers 6-13 and the diagonal left undefined. To evaluate average pairwise decoding accuracy,  
269 we computed the average of the lower triangular matrix (excluding the diagonal).

270 We assessed significance for the within-format decoding analysis with a sign  
271 permutation test. We ran the decoding procedure 1,000 times for each participant, then  
272 randomly multiplied the resulting accuracy values within each iteration by +1 or -1. These sign-  
273 permuted accuracies were averaged across all participants to generate a null distribution of  
274 decoding accuracies.  $P$ -values were determined as one minus the percentile rank of the  
275 veridical group mean in this null distribution. These  $p$ -values were corrected according to the  
276 false-discovery rate (FDR) and were considered significant if the corrected  $p$ -value did not  
277 exceed 0.05 in a one-tailed test and was contiguous with at least 2 other significant time points.

278

### 279 *Between-format SVM cross-classification*

280 The following between-format classification steps were conducted between digit and word  
281 trials, digit and dot array trials, and word and dot array trials. Cross-classification used the same  
282 preprocessing steps as within-format classification. At each time point for each pair of  
283 numerosities, we trained a classifier on all supertrials in format 1 and tested this model on all  
284 supertrials in format 2. This was repeated by training on format 2 and testing on format 1, and  
285 the whole process repeated 100 times with different supertrial assignment each time. Because  
286 training and testing data were extracted from independent experimental runs, all supertrials  
287 within a given classification permutation were included as opposed to using leave-one-out  
288 classification. Pairwise accuracy values in the form of an 8 x 8 matrix for both directions of  
289 classification were averaged together to yield an average cross-format classification result.  
290 Average cross-format pairwise decoding accuracy was evaluated by computing the average of  
291 the lower triangular matrix, with the diagonal defined in this case. Significance was assessed for  
292 the between-format cross-classification procedure using the same sign permutation test steps  
293 as outlined above for the within-format classification.

294

### 295 *Representational similarity analysis*

296 RSA allows the comparison of neural signals and predictive models by abstracting patterns of  
297 information from modality-specific representations (Kriegeskorte et al., 2008). In this study, we  
298 were interested in comparing the neural representational space with two models: a GIST  
299 feature model capturing low-level visual properties of each stimulus and a second model based  
300 on the number magnitude represented by the stimuli. We converted MEG patterns into  
301 representational dissimilarity matrices (RDMs) that quantify the pairwise relationship between  
302 all patterns of experimental conditions. At each time point, we quantified how much variance in  
303 the MEG RDM was accounted for by each model.

304

### 305 *MEG similarity matrices*

306 To construct RDMs from the MEG data, we first computed the pattern of response elicited by  
307 each number at each time point. We calculated the mean pattern of response in the  
308 preprocessed 192-component space for all trials of each number. This yielded 8 MEG patterns  
309 (one for each number 6-13) for each of the three formats at each time point. Within each  
310 format, we used a Spearman correlation to compute the similarity between all pairs of the 8  
311 patterns, and subtracted these correlation values from 1 to result in three 8 x 8 MEG RDMs for  
312 each time point. These RDMs were analyzed further by quantifying their relationship with  
313 model matrices, as described below.

314

### 315 *Representational dissimilarity matrices for GIST features and approximate number*

316 To characterize the temporal evolution of number-related information in the MEG signal, we  
317 compared two models to MEG data: a GIST feature model that provides an account of gross  
318 visual differences between stimuli, and an approximate number model based on the properties  
319 of the ANS.

320 The GIST model describes the distributions of orientations and spatial frequencies  
321 present in the stimuli (Oliva and Torralba, 2001). Each image was passed through a bank of



322 Gabor filters with 3 spatial frequencies and 12 orientations for high spatial frequencies, 8  
323 orientations for moderate spatial frequencies, and 6 orientations for low spatial frequencies (26  
324 filters). Filter outputs were computed in an 8 x 8 grid, resulting in 1664 features. We computed  
325 the pattern of response across these features for each stimulus. A Spearman correlation was  
326 computed between all pattern vectors within a format, yielding a 256 x 256 meta-matrix. This  
327 matrix was subtracted from 1 to generate a dissimilarity matrix. We computed the mean  
328 dissimilarity across the 32 exemplars per number to yield an 8 x 8 RDM for each format.

329 We generated the approximate number RDM from the pairwise dissimilarities in log-  
330 scaled magnitude of all numbers 6-13. By using the log-transform of absolute pairwise  
331 differences, we more closely approximate the tuning curves of the ANS that have been shown  
332 to govern number representations outside of subitizing range (numbers 1-4). This model was  
333 equivalent for all three number formats.

334

### 335 *RDM comparisons*

336 We first computed the correlation of our models to assess their general similarity, before  
337 comparing them to MEG signal. Spearman's  $r$  was calculated for each pair of models, and the  
338 significance of correlations was tested with a row shuffled randomization test: for the pair of  
339 models in question, the rows and columns of the first RDM were randomly permuted before  
340 computing the Spearman's  $r$  between the second model RDM. We repeated this procedure  
341 1,000 times to generate a null distribution of correlation coefficients, and the results were  
342 judged to be significant if they showed a higher correlation coefficient than the distribution cut-  
343 off determined at  $p < 0.05$ .

344

### 345 *Variance Partitioning: Unique and Shared Contributions*

346 Given that our two models could explain overlapping portions of the variance in the MEG  
347 RDMs, we conducted a variance partitioning analysis to determine the unique and shared  
348 variance accounted for by each model (see Groen et al., 2012, Greene et al., 2016, and Bankson  
349 et al., 2018, for similar approaches). We accounted for the variance in the MEG RSMs using  
350 different combinations of RDMs as regressors: 1) a 'complete' regression with each RDM  
351 serving as a predictor, 2) a 'single-predictor regression' with only the GIST RDM as a predictor,  
352 and 3) another 'single-predictor regression' with only the approximate number RDM as a  
353 predictor. We subtracted the explained variance ( $R^2$ ) values of these different regression  
354 analyses to measure the partitions of variance uniquely explained by each model, and the  
355 variance explained by both RDMs. We determined statistical significance by running a row  
356 shuffled randomization test as described above: rows and columns of model matrices were  
357 randomized 1000 times and the original analysis repeated. The same randomization index was  
358 used across all models to match the randomization test assumptions, and the significance  
359 cutoffs for  $R^2$  values were set to  $p < 0.01$  (FDR-corrected) and required to be contiguous with at  
360 least 2 other significant time points. Because these statistical analyses are permutation based,  
361 they implicitly test against the baseline of variance rather than an alternate null hypothesis of  
362  $R^2 = 0$ . We established a variance baseline by repeating the above variance partitioning analysis  
363 with two noise models and simulated MEG data (all generated from random number  
364 assignment) to demonstrate the non-zero variance baseline.

## 365 Results

366

### 367 *Temporal dynamics of within-format number representations*

368 To quantify the time course of representations for individual numbers, we used time-resolved  
369 multivariate decoding and conducted pairwise classification between MEG signal patterns in  
370 response to number stimuli in digit, dot array, or word formats (Figure 2). Pairwise classification  
371 was conducted only for MEG signal in response to the first number presented in each trial.  
372 Individual digits could be differentiated rapidly after stimulus onset, peaking at 110 ms (mean  
373 accuracy: 75.04%) and showed a slow decay in decoding accuracy that remained significantly  
374 above chance for the majority of the first stimulus trial window (800 ms). Individual words  
375 showed a similar time course but lower decoding accuracy, peaking at 110 ms (63.4%) and  
376 remaining significantly above chance until ~600 ms after stimulus onset. Individual dot arrays  
377 again showed a similar peak in decoding accuracy at 110 ms (57.55%) but had less sustained  
378 decoding accuracy than the other two stimulus formats. These results indicate that neural  
379 representations of number arise quickly regardless of presentation format. However, these  
380 representations could be format-specific or could be shared across formats. To test the nature  
381 of the representations, we next conducted cross-decoding between formats.

382

383

384

385

386

387

388

389

390

391

392

393

394

395

396

397

398

399

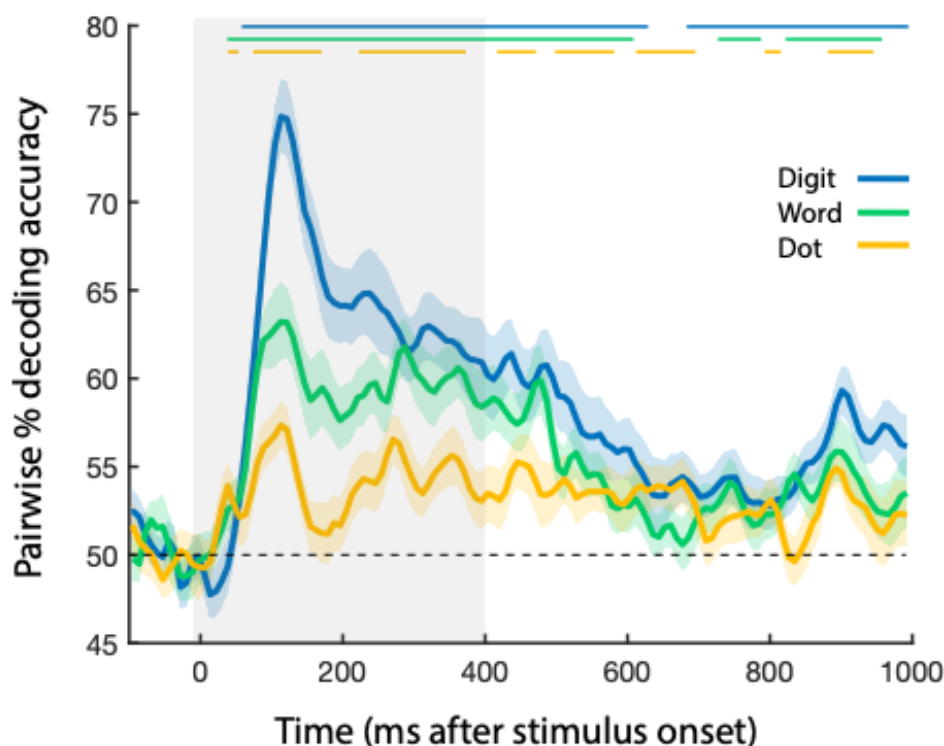

398

399

400

401

402

403

404

405

**Figure 2.** Time-resolved within-format number classification. After the onset of the object stimulus (depicted in gray from 0-400 ms), pairwise number classification accuracy increased rapidly for all three number formats. Error bars reflect SEM across participants for each time point separately. Significance is marked at the top of the figure, corresponding to  $p < .05$  (FDR corrected).

## 406 *Temporal dynamics of between-format number individuation*

407 We trained a linear SVM classifier on one format then tested it on another, completing this  
408 process for all pairs of formats: digits and words, digits and dots, and words and dots. This  
409 procedure was conducted in both directions, and the results averaged (i.e. train on dots, test on  
410 digits; train on digits, test on dots). Digits and dots showed a first peak at 100 ms (mean  
411 accuracy: 52.34%), with significant above chance classification accuracy from 60-120 ms and at  
412 several later time points between 290-685 ms after stimulus onset. Digits and words showed a  
413 similar early peak at 100 ms (52.06%) and a second peak at 290 ms (52.15%); digit and word  
414 cross-classification was significantly above chance from 40-110 ms and 270-370 ms after  
415 stimulus onset. Word and dot classification was never significantly above chance. The results  
416 here suggest shared number representations that are more limited than within-format number  
417 information. These shared number representations also exist to a greater degree between  
418 digits / dots and digits / words than dots / words in the context of this magnitude judgment  
419 task.

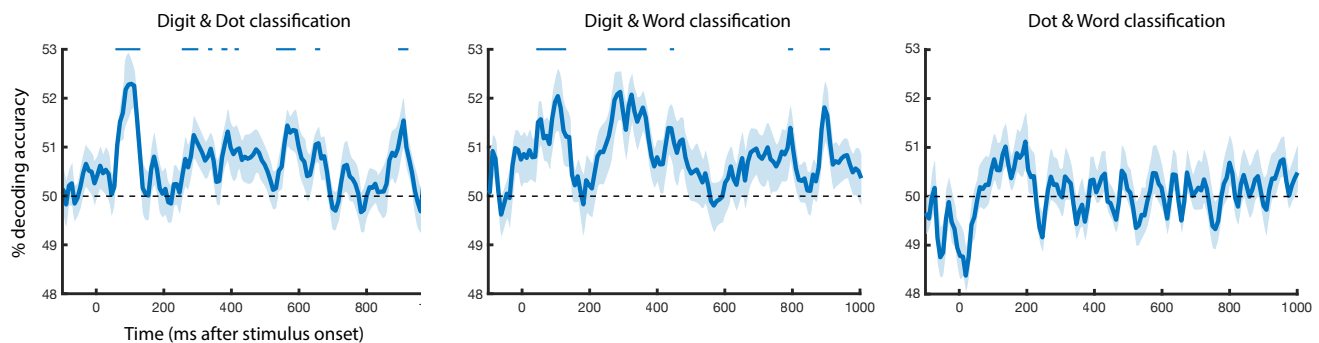

420 **Figure 3.** Time-resolved between-format cross classification. Classifiers were trained and tested on digit and dot  
421 stimuli, digit and word stimuli, and dot and word stimuli to ascertain representational overlap between different  
422 number formats at each time point. Pairwise cross-classification accuracy increased after stimulus onset for digit /  
423 dot and digit / word comparisons, but not for dot / word comparison. Error bars reflect SEM across participants for  
424 each time point separately. Significance is marked at the top of the figure, corresponding to  $p < .05$  (FDR  
425 corrected).

426

## 427 *Model Similarity*

428 We compared MEG signal to two models: a GIST visual feature model and an approximate  
429 number model. To quantify the relationships between the models derived from GIST features  
430 and number magnitude, we computed the correlation between the model RDMs (Figure 4a).  
431 GIST and number magnitude models were most strongly correlated for dot array stimuli ( $r =$   
432  $0.72$ ,  $p < .001$ ), followed by digit ( $r = 0.39$ ,  $p = 0.02$ ), and word stimuli ( $r = 0.26$ ,  $p = 0.18$ ). The  
433 high correlation between GIST features and number magnitude for dot array and the modest  
434 correlation for digit stimuli suggests that number decoding within and between these formats  
435 may be driven by GIST features as opposed to associated magnitude information. Because of  
436 these significant correlations, we conducted variance partitioning analyses to determine how  
437 much unique variance number magnitude versus GIST features could account for in the MEG  
438 signal.

439

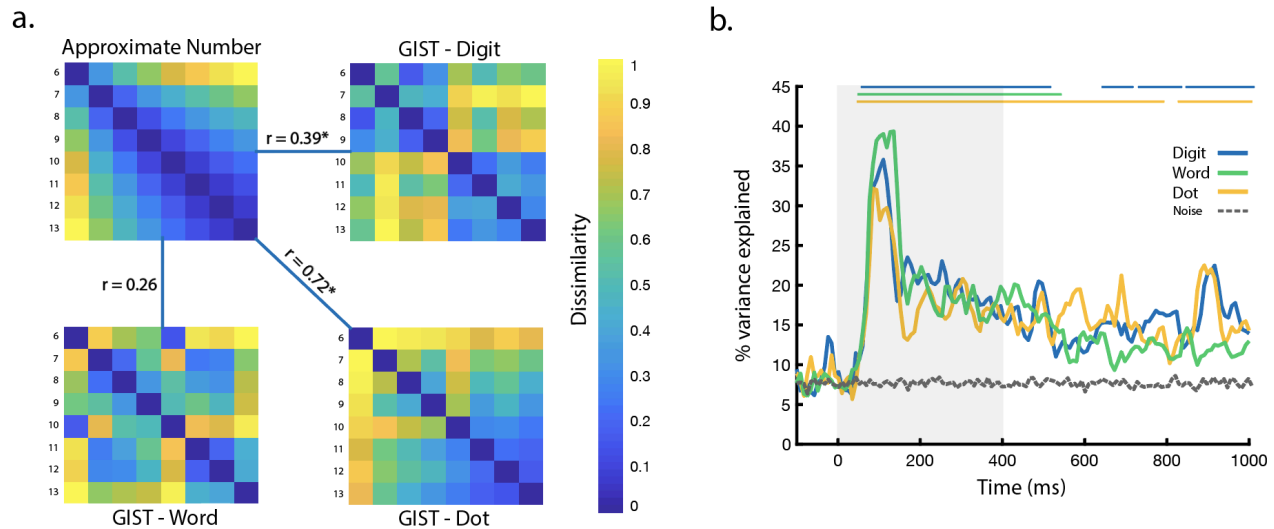

440 **Figure 4: a.** RDM comparisons between approximate number model with format-specific GIST models for digit,  
 441 dot, and word stimuli. RDMs are plotted by rank to enhance visual contrast. Spearman correlations between the  
 442 approximate number model and GIST for digits and dot stimuli were significant ( $p < .05$ ), assessed with row  
 443 permutation tests. **b.** Time resolved variance partitioning showing the total variance explained by both models for  
 444 MEG signal in response to each stimulus format. Baseline variance is plotted in gray. Significant time points are  
 445 marked at the top of the figure, corresponding to  $p < .01$  (FDR corrected).  
 446

### 447 Variance Partitioning

448 We conducted a variance partitioning analysis that described the unique variance in the MEG  
 449 response accounted for by each model and the shared variance accounted for by both models.  
 450 We used a threshold of  $p < 0.01$  (FDR-corrected) to determine significant model contributions  
 451 to MEG variance (Figure 4b).

452 For MEG responses to digit stimuli, the GIST model explained unique variance at early  
 453 time points, 70-370 ms after stimulus onset with a peak at 110 ms ( $R^2$ : 23.5%) (Figure 5). In  
 454 contrast, the approximate number model explained significant portions of MEG variance  
 455 primarily after 760 ms, with a peak after presentation of the second stimulus at 916 ms ( $R^2$ :  
 456 18.9%). The GIST model and approximate number model accounted for shared variance from  
 457 85 – 270 ms after stimulus presentation with a peak at 110 ms ( $R^2$ : 7.8%). The total variance  
 458 explained by unique and shared model contributions was significant from 70 – 520 ms and 630  
 459 – 1000 ms after stimulus presentation with a peak at 110 ms ( $R^2$ : 35.8%).

460 For MEG responses to the dot array stimuli, the GIST model explained significant  
 461 variance from 75 – 260 ms and again sporadically between 390 – 980 ms after stimulus onset,  
 462 with a peak at 85 ms ( $R^2$ : 16.8%). The approximate number model did not significantly explain  
 463 any unique MEG variance throughout the entire time course. The combination of GIST +  
 464 approximate number models explained a significant portion of the variance from 75 – 160 ms  
 465 (peak 150 ms,  $R^2$ : 10.1%), and then between 280 – 320 ms. The slightly negative deflection of  
 466 shared variance between GIST + approximate number models from 400-600 ms is not atypical  
 467 for variance partitioning analyses: this pattern suggests that the GIST model does not capture  
 468 information that is relevant to the approximate number model, and vice versa (Pedhazur,

469 1997). The total variance explained from unique and shared model contributions was significant  
470 from 60 – 790 ms and again from 820-1000 ms, with a peak at 85 ms ( $R^2$ : 32.15%).

471 Finally, for MEG responses to the word stimuli, the GIST model explained unique  
472 variance 70-350 ms after stimulus presentation and later from 390-510 ms, with a peak at 110  
473 ms ( $R^2$ : 27.9%). The approximate number model did not significantly account for any unique  
474 MEG variance during the entire time course. The GIST model and approximate number model  
475 explained shared variance starting at 70 ms after stimulus onset until 230 ms (peak 130 ms,  $R^2$ :  
476 10.1% ), and briefly from 350-390 ms. The total variance explained by unique and shared model  
477 contributions was significant from 60-520 ms after stimulus onset, with a peak at 135 ms ( $R^2$ :  
478 39.4% ).

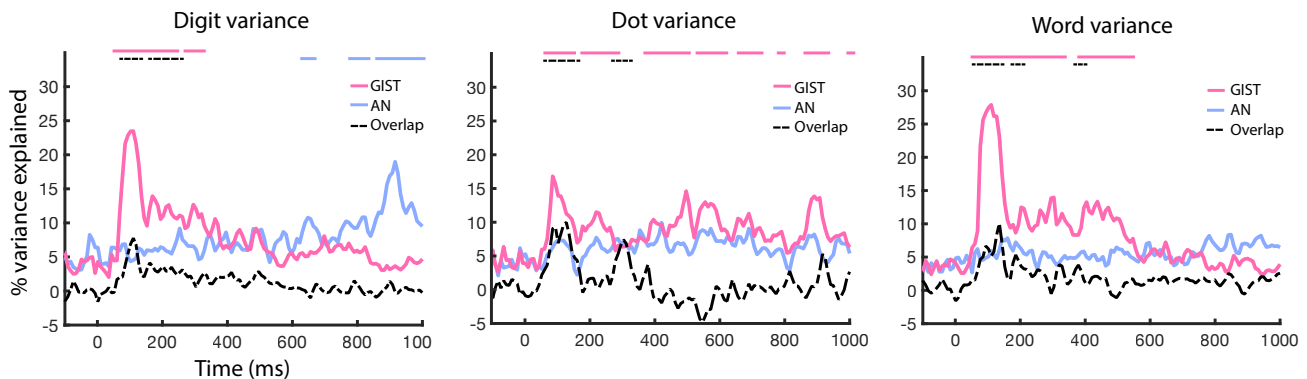

479 **Figure 5.** Time resolved variance partitioning showing the total unique and shared variance explained by both  
480 models for MEG signal in response to each stimulus format. Significant time points are marked at the top of the  
481 figure, corresponding to  $p < .01$  (FDR corrected).

482

## 483 Discussion

484 In this study, we examined the time course of number representation in both symbolic and  
485 non-symbolic formats from patterns of whole-brain MEG signal. Our results support the  
486 existence of both distinct and shared representations for symbolic and non-symbolic number.  
487 Using within-format decoding, we show that individual digits, number words, and dot arrays  
488 can all be classified above chance within 110 ms of stimulus presentation. This suggests that  
489 format-specific representations of digits, words, and dot displays have similar temporal  
490 dynamics, emerging early after image presentation, then persisting throughout the trial. Using  
491 between-format classification, we demonstrated shared representations between digits &  
492 words and digits & dots at early (60-110 ms) and later (300-450 ms) latencies. Finally, model-  
493 based RSA showed predominant contribution of the GIST model to early MEG variance in  
494 response to all number formats, whereas an approximate number model explained significant  
495 variance solely for symbolic digit MEG responses at longer latencies.

496 Our results on within-format number classification indicate that representations for  
497 individual numbers can be accurately decoded within the first 100 ms of stimulus presentation,  
498 regardless of symbolic or non-symbolic format. Using a similar paradigm, Teichmann et al.  
499 (2018) also reported above chance classification for individual numbers presented as digits or  
500 dice, though in their study significant classification emerged later in time. While significant  
501 classification in our study emerged at ~50ms after stimulus onset and peaked at 110ms,



502 significant classification in their study emerged around 120-145 ms and peaked at 250ms.  
503 Importantly, we did not vary the retinotopic position of our stimuli, while Teichmann et al. did.  
504 The early representations reported in our experiment may be retinotopically specified, whereas  
505 the later representations reported in Teichmann et al. may be tolerant to variation in  
506 retinotopic position. Support for this claim comes from the fact that the early representations  
507 in our study were well explained by the GIST model. This pattern of results is consistent with  
508 previous MEG studies indicating that the earliest time points following stimulus presentation  
509 carry retinotopically specific representations, whereas position-invariant representations begin  
510 to emerge by about 150 ms (Wardle et al., 2016; Isik et al., 2013).

511 Our cross-classification results between digits and word stimuli provide some evidence  
512 of shared representations between symbolic number formats. Previously, Teichmann et al.  
513 (2018) also reported evidence for shared representations between two symbolic formats: digit  
514 and dice stimuli. They show significant between-format decoding for a brief period around 400  
515 ms, suggesting a late emergence of a shared number representation. Similarly, we found  
516 limited evidence of shared representations from 300-400 ms, but we also demonstrated  
517 significant cross-classification between digits and words at very early time points from ~50 –  
518 110 ms after stimulus presentation. Our results suggest that associations between symbolic  
519 formats might be an early component of the visual representation for number. In both studies,  
520 this association may be due to shared word representations between the two stimulus formats  
521 rather than shared magnitude representations.

522 Our cross-classification results between digits and dot displays suggest that associations  
523 between digit representations and the magnitude representations of the ANS may arise within  
524 100 ms of stimulus onset. Our stimulus set (numbers 6-13) was chosen to avoid numbers in or  
525 near the subitizing range, so all non-symbolic numbers were represented by the ANS rather  
526 than working memory systems that rely on parallel individuation. Therefore, the association  
527 between symbolic and non-symbolic number in our study is likely supported by the ANS. These  
528 results are consistent with behavioral findings that adults can accurately compare symbolic and  
529 non-symbolic number up to about the number twelve, though the associative mapping is  
530 weaker for higher numbers (Sullivan and Barner, 2013). In contrast to our study, Teichmann et  
531 al. (2018) utilized the numbers 1-6, so most of their stimuli were nameable numbers within the  
532 subitizing range. By using larger numbers outside of this range, our findings build upon these  
533 previous results and provide some evidence that the association between digit representations  
534 and the ANS is registered automatically and quickly by the visual system.

535 Although the dot / word cross-classification did not yield any periods of significant  
536 decoding, this null result cannot speak to the existence or lack of representational overlap  
537 between number words and dot stimuli. These two formats showed the weakest within-format  
538 classification accuracies, so perhaps a higher-powered study focusing just on these two formats  
539 would yield the data necessary to investigate whether shared representations can be found  
540 between number words and the ANS.

541 The variance partitioning analyses allowed us to tease apart when the GIST model and  
542 an approximate number model explained variance in the neural representations for number  
543 stimuli. For digits, the MEG signal contains an early response within the first 100 ms that is  
544 uniquely explained by the GIST model as well as shared information between GIST +  
545 approximate number models to a certain degree. Later, the MEG signal for digits is increasingly



546 explained by the approximate number model rather than the GIST model. Strikingly, the  
547 approximate number model explains the most variance at 916 ms, or 116 ms after the  
548 presentation of the second number stimuli in each trial. This latency precisely coincides with  
549 the timing by which magnitude information from the first stimulus becomes behaviorally  
550 relevant. This pattern of results suggests that neural responses transitioned from representing  
551 visual information to representing magnitude information at the time in the trial when those  
552 magnitude representations became task-relevant. Results from the word stimuli showed  
553 contrasting results: the approximate number model did not explain the MEG signal across the  
554 entire time course, and instead the GIST model uniquely explains a majority of the variance  
555 within 500 ms of stimulus presentation. The unique pattern of results for digits in comparison  
556 to words could indicate the frequency and facility with which we manipulate number  
557 information in the form of digits as opposed to number words.

558 The model analyses for the dot stimuli highlight the unavoidable fact that approximate  
559 number representations are highly correlated with other low-level visual features. The  
560 correlation between the GIST model and the approximate number model for the dot displays  
561 was  $r = 0.72$  while it was much smaller for the digit and word displays ( $r = 0.39$  and  $r = 0.26$ ,  
562 respectively). This exemplifies that the mapping between visual features and numerosity is  
563 fairly arbitrary for number symbols, but highly meaningful for dot arrays: GIST features provide  
564 dominant information on number magnitude. Neuroscientific experiments (Harvey et al., 2013;  
565 Nieder et al., 2002) and psychophysical experiments (Burr and Ross, 2008; Cicchini et al., 2016)  
566 have established that number representations can be formed without the use of any one low-  
567 level visual feature that usually correlates with number. At the same time, accuracy of number  
568 comparison is affected by the ways in which low-level visual features covary with number,  
569 suggesting that the visual system ordinarily relies on these low-level visual features to form  
570 more accurate number representations (Gebuis et al., 2009; Gebuis and Reynvoet, 2012).  
571 Future MEG decoding studies could address the current observations by systematically varying  
572 low-level features of dot display stimuli to explore their role in tuning dynamic representations  
573 of approximate number.

574 Despite the fine-grained temporal resolution of our analyses, we cannot comment on  
575 the spatial origin of the representations being studied here. Particularly with regards to the  
576 early contributions of the GIST model to MEG signal variance across all three number formats,  
577 an important expansion of this work could entail using human intracranial recordings to  
578 examine the spatial extent of early visual activity in representing symbolic and non-symbolic  
579 number across ventral temporal and lateral parietal areas.

580 Many studies have searched for shared representations between symbolic and non-  
581 symbolic number with the assumption that these “abstract” number representations provide  
582 the foundation for mathematical cognition (Gallistel and Gelman, 2000; Dehaene, 2007;  
583 Dehaene, 2009; Piazza, 2011). We agree that ANS representations play a role in some everyday  
584 mathematical tasks; the heavily replicated distance effect supports the view that the ANS plays  
585 a role in common number comparison tasks in both children (Holloway and Ansari, 2009) and  
586 adults (Libertus et al., 2007; Moyer and Landauer, 1967; Dehaene et al., 1990). Moreover,  
587 structural alignment processes may allow the ANS to be recruited broadly when reasoning  
588 about any magnitude, for example reward probabilities (Luyckx, 2019). However, neither  
589 empirical evidence nor theoretical arguments support the view that the ANS is the primary

590 foundation of mathematical cognition. While individual studies have argued for stronger  
591 effects, a recent meta-analysis concluded that the ability to compare the magnitude of non-  
592 symbolic number stimuli is only weakly correlated with mathematical achievement ( $r = 0.241$ ,  
593 CI [.198, .284]) (Schneider et al., 2017). More importantly though, a primary source of  
594 mathematical thought during development is the construction of integer representations when  
595 learning to count, and these representations cannot in principle be supported by the ANS  
596 (Carey, 2009). Adults and children alike can form integer representations that exactly  
597 enumerate sets, giving us the knowledge that 278 is exactly one less than 279; the *approximate*  
598 number system is by its very definition incapable of supporting this knowledge. In order to  
599 understand how mathematical thought gets off the ground, we not only need to understand  
600 how number symbols are associated with ANS representations, but also how the brain forms  
601 exact representations that transcend the limitations of the ANS. Representations unique to  
602 symbolic number play a foundational role in mathematical thought, a role that could never be  
603 filled by “abstract” number representations shared for digits and dot displays.

604 Collectively, our results provide evidence that representations of numerosity and  
605 number symbols are formed from dot displays, digits, and number words within 100ms after  
606 stimulus presentation. These representations are largely format-specific as evidenced by 1)  
607 higher decoding accuracy for within-format classification as compared to between-format  
608 classification, and 2) heterogeneous model contributions to the MEG signal for each stimulus  
609 format. We do find some evidence for shared representations between symbolic and non-  
610 symbolic number at early (~100 ms) and later (~300 ms) timepoints, though evidence for a  
611 robust and singular “abstract” number representation was much weaker than evidence for  
612 format-specific representations. Our results support the view that multiple format-specific  
613 representations, more so than a singular “abstract” number representation, underlie the ability  
614 to compare numerical magnitudes. In order to more fully understand the neural underpinnings  
615 of mathematical thought, future work will need to characterize how the brain implements  
616 integer representations in a symbolic number system in concert with approximate number  
617 representations in a nonsymbolic number system.

618  
619  
620  
621  
622  
623  
624  
625  
626  
627  
628  
629  
630  
631  
632  
633

## 634 **References**

635

- 636 Agrillo, C., Piffer, L., Bisazza, A., & Butterworth, B. (2012). Evidence for two numerical systems  
637 that are similar in humans and guppies. *PloS one*, 7(2), e31923.
- 638 Bankson, B. B., Hebart, M. N., Groen, I. I., & Baker, C. I. (2018). The temporal evolution of  
639 conceptual object representations revealed through models of behavior, semantics and  
640 deep neural networks. *NeuroImage*, 178, 172-182.
- 641 Brainard, D. H. (1997). The psychophysics toolbox. *Spatial vision*, 10, 433-436.
- 642 Bulthé, J., De Smedt, B., & de Beeck, H. O. (2014). Format-dependent representations of  
643 symbolic and non-symbolic numbers in the human cortex as revealed by multi-voxel  
644 pattern analyses. *NeuroImage*, 87, 311-322.
- 645 Bulthé, J., De Smedt, B., & Op de Beeck, H. P. (2015). Visual number beats abstract numerical  
646 magnitude: format-dependent representation of Arabic digits and dot patterns in human  
647 parietal cortex. *Journal of cognitive neuroscience*, 27(7), 1376-1387.
- 648 Burr, D., & Ross, J. (2008). A visual sense of number. *Current biology*, 18(6), 425-428.
- 649 Cantlon, J. F., & Brannon, E. M. (2006). Shared system for ordering small and large numbers in  
650 monkeys and humans. *Psychological science*, 17(5), 401-406.
- 651 Carey, S. (2009). Beyond Core Cognition: Natural Number. In *The origin of concepts* (pp. 287-  
652 333). New York, NY: Oxford University Press.
- 653 Chang, C. C., & Lin, C. J. (2011). LIBSVM: A library for support vector machines. *ACM*  
654 *transactions on intelligent systems and technology (TIST)*, 2(3), 27.
- 655 Cicchini, G. M., Anobile, G., & Burr, D. C. (2016). Spontaneous perception of numerosity in  
656 humans. *Nature communications*, 7, 12536.
- 657 Dehaene, S., Dupoux, E., & Mehler, J. (1990). Is numerical comparison digital? Analogical and  
658 symbolic effects in two-digit number comparison. *Journal of Experimental Psychology:*  
659 *Human Perception and Performance*, 16(3), 626.
- 660 Dehaene, S., & Cohen, L. (2007). Cultural recycling of cortical maps. *Neuron*, 56(2), 384-398.
- 661 Dehaene, S. (2009). *Reading in the brain: The new science of how we read*. Penguin.
- 662 Ditz, H. M., & Nieder, A. (2015). Neurons selective to the number of visual items in the corvid  
663 songbird endbrain. *Proceedings of the National Academy of Sciences*, 112(25), 7827-7832.
- 664 Feigenson, L., Dehaene, S., & Spelke, E. (2004). Core systems of number. *Trends in cognitive*  
665 *sciences*, 8(7), 307-314.
- 666 Gallistel, C. R., & Gelman, R. (2000). Non-verbal numerical cognition: From reals to integers.  
667 *Trends in cognitive sciences*, 4(2), 59-65.
- 668 Gebuis, T., Kadosh, R. C., de Haan, E., & Henik, A. (2009). Automatic quantity processing in 5-  
669 year olds and adults. *Cognitive processing*, 10(2), 133-142.
- 670 Gebuis, T., & Reynvoet, B. (2011). Generating nonsymbolic number stimuli. *Behavior research*  
671 *methods*, 43(4), 981-986.
- 672 Gebuis, T., & Reynvoet, B. (2012). The interplay between nonsymbolic number and its  
673 continuous visual properties. *Journal of Experimental Psychology: General*, 141(4), 642.
- 674 Greene, M. R., Baldassano, C., Esteva, A., Beck, D. M., & Fei-Fei, L. (2016). Visual scenes are  
675 categorized by function. *Journal of Experimental Psychology: General*, 145(1), 82.
- 676

- 677 Groen, I. I., Ghebreab, S., Lamme, V. A., & Scholte, H. S. (2012). Spatially pooled contrast  
678 responses predict neural and perceptual similarity of naturalistic image categories. *PLoS*  
679 *computational biology*, 8(10), e1002726.
- 680 Grootswagers, T., Wardle, S. G., & Carlson, T. A. (2017). Decoding dynamic brain patterns from  
681 evoked responses: A tutorial on multivariate pattern analysis applied to time series  
682 neuroimaging data. *Journal of cognitive neuroscience*, 29(4), 677-697.
- 683 Harvey, B. M., Klein, B. P., Petridou, N., & Dumoulin, S. O. (2013). Topographic representation of  
684 numerosity in the human parietal cortex. *Science*, 341(6150), 1123-1126.
- 685 Hebart, M. N., Görden, K., & Haynes, J. D. (2015). The Decoding Toolbox (TDT): a versatile  
686 software package for multivariate analyses of functional imaging data. *Frontiers in*  
687 *neuroinformatics*, 8, 88.
- 688 Hebart, M. N., Bankson, B. B., Harel, A., Baker, C. I., & Cichy, R. M. (2018). The representational  
689 dynamics of task and object processing in humans. *elife*, 7, e32816.
- 690 Holloway, I. D., & Ansari, D. (2009). Mapping numerical magnitudes onto symbols: The  
691 numerical distance effect and individual differences in children's mathematics  
692 achievement. *Journal of experimental child psychology*, 103(1), 17-29.
- 693 Isik, L., Meyers, E. M., Leibo, J. Z., & Poggio, T. (2013). The dynamics of invariant object  
694 recognition in the human visual system. *Journal of neurophysiology*, 111(1), 91-102.
- 695 Kadosh, R. C., & Walsh, V. (2009). Numerical representation in the parietal lobes: Abstract or  
696 not abstract? *Behavioral and brain sciences*, 32(3-4), 313-328.
- 697 Kriegeskorte, N., Mur, M., & Bandettini, P. A. (2008). Representational similarity analysis-  
698 connecting the branches of systems neuroscience. *Frontiers in systems neuroscience*, 2, 4.
- 699 Libertus, M. E., Woldorff, M. G., & Brannon, E. M. (2007). Electrophysiological evidence for  
700 notation independence in numerical processing. *Behavioral and Brain Functions*, 3(1), 1.
- 701 Luyckx, F., Nili, H., Spitzer, B., & Summerfield, C. (2019). Neural structure mapping in human  
702 probabilistic reward learning. *eLife*, 8, e42816.
- 703 Lussier, C. A., & Cantlon, J. F. (2017). Developmental bias for number words in the intraparietal  
704 sulcus. *Developmental science*, 20(3), e12385.
- 705 Moyer, R. S., & Landauer, T. K. (1967). Time required for judgements of numerical  
706 inequality. *Nature*.
- 707 Nieder, A., Freedman, D. J., & Miller, E. K. (2002). Representation of the quantity of visual items  
708 in the primate prefrontal cortex. *Science*, 297(5587), 1708-1711.
- 709 Nieder, A. (2016). The neuronal code for number. *Nature Reviews Neuroscience*, 17(6), 366.
- 710 Oliva, A., & Torralba, A. (2001). Modeling the shape of the scene: A holistic representation of  
711 the spatial envelope. *International journal of computer vision*, 42(3), 145-175.
- 712 Pedhazur, E. J., 1997. Multiple regression in behavioral research: Explanation and prediction, 3rd  
713 Edition. Orlando, FL: Harcourt Brace.
- 714 Piazza, M., Izard, V., Pinel, P., Le Bihan, D., & Dehaene, S. (2004). Tuning curves for approximate  
715 numerosity in the human intraparietal sulcus. *Neuron*, 44(3), 547-555.
- 716 Piazza, M., Pinel, P., Le Bihan, D., & Dehaene, S. (2007). A magnitude code common to  
717 numerosities and number symbols in human intraparietal cortex. *Neuron*, 53(2), 293-305.
- 718 Piazza, M. (2011). Neurocognitive start-up tools for symbolic number representations. In *Space,*  
719 *Time and Number in the Brain* (pp. 267-285). Academic Press.

- 720 Piffer, L., Petrizzini, M. E. M., & Agrillo, C. (2013). Large number discrimination in newborn  
721 fish. *PLoS One*, 8(4), e62466.
- 722 Schneider, M., Beeres, K., Coban, L., Merz, S., Susan Schmidt, S., Stricker, J., & De Smedt, B.  
723 (2017). Associations of non-symbolic and symbolic numerical magnitude processing with  
724 mathematical competence: A meta-analysis. *Developmental science*, 20(3), e12372.
- 725 Sullivan, J., & Barner, D. (2013). How are number words mapped to approximate magnitudes?.  
726 *The Quarterly Journal of Experimental Psychology*, 66(2), 389-402.
- 727 Tadel, F., Baillet, S., Mosher, J. C., Pantazis, D., & Leahy, R. M. (2011). Brainstorm: a user-  
728 friendly application for MEG/EEG analysis. *Computational intelligence and neuroscience*,  
729 2011, 8.
- 730 Teichmann, L., Grootswagers, T., Carlson, T., & Rich, A. N. (2018). Decoding digits and dice with  
731 Magnetoencephalography: Evidence for a shared representation of magnitude. *Journal of*  
732 *cognitive neuroscience*, 30(7), 999-1010.
- 733 Wardle, S. G., Kriegeskorte, N., Grootswagers, T., Khaligh-Razavi, S. M., & Carlson, T. A. (2016).  
734 Perceptual similarity of visual patterns predicts dynamic neural activation patterns  
735 measured with MEG. *Neuroimage*, 132, 59-70.
- 736 Xu, F., & Spelke, E. S. (2000). Large number discrimination in 6-month-old  
737 infants. *Cognition*, 74(1), B1-B11.
- 738 Yeo, D. J., Wilkey, E. D., & Price, G. R. (2017). The search for the number form area: A functional  
739 neuroimaging meta-analysis. *Neuroscience & Biobehavioral Reviews*, 78, 145-160.
- 740  
741
